# Supplementary material
Source: PubMed Central journal article supplement (PMC2857507)
Supplement: NIHMS188751-supplement-Appendix.pdf [file NIHMS188751-supplement-Appendix.pdf]

# RESEARCH REPORTS

Biological

W.L. Siqueira, E. Salih, D.L. Wan,  
E.J. Helmerhorst, and F.G. Oppenheim\*

Department of Periodontology and Oral Biology, Goldman School of Dental Medicine, Boston University, 700 Albany Street, CABR, Suite W-201, Boston, MA 02118, USA;  
\*corresponding author, fropp@bu.edu

## Proteome of Human Minor Salivary Gland Secretion

*J Dent Res* 87(5):445-450, 2008

### APPENDIX

**Appendix Table.** Proteins Identified from Labial Minor Salivary Gland Secretion by LC-ESI-MS/MS

| Protein Name                                                                      | Accession Number <sup>a</sup> | Sample Preparations <sup>b</sup> | pI   | MW (Da) <sup>c</sup> | # Full Tryptic Peptides Identified <sup>d</sup> | Molecular Function                                                                                                                                                                                                          |
|-----------------------------------------------------------------------------------|-------------------------------|----------------------------------|------|----------------------|-------------------------------------------------|-----------------------------------------------------------------------------------------------------------------------------------------------------------------------------------------------------------------------------|
| Mucin-5B                                                                          | Q9HC84                        | A,B,C                            | 6.2  | 588002               | 17                                              | Contribute to the lubricating and viscoelastic properties of whole saliva                                                                                                                                                   |
| Pyruvate kinase isoenzymes M1/m2                                                  | <b>P14618</b>                 | B,C                              | 7.9  | 57805                | 12                                              | Protein binding, kinase activity, pyruvate kinase activity, transferase activity                                                                                                                                            |
| Ig gamma-1 chain C region                                                         | P01857                        | A                                | 8.4  | 36105                | 9                                               | Antigen binding, immune system process, protein binding                                                                                                                                                                     |
| Salivary acidic-proline-rich protein 1/2 precursor (PRP-1/PRP-2)                  | <b>P02810</b>                 | A,C                              | 4.6  | 15372                | 9                                               | Protein binding, G-protein-coupled receptor activity                                                                                                                                                                        |
| Basic salivary-proline-rich protein 2 (salivary-proline-rich protein)             | <b>P02812</b>                 | A,B                              | 12.1 | 37277                | 8                                               | Precipitation of tannin, lubrication of oral tissue                                                                                                                                                                         |
| Serum albumin                                                                     | <b>P02768</b>                 | A,B,C                            | 5.9  | 69366                | 7                                               | Protein binding, ion binding, antigen binding, lipid binding                                                                                                                                                                |
| Alpha-amylase 2B amylase activity                                                 | P04745                        | B,C                              | 6.4  | 55890                | 7                                               | Protein binding, hydrolase activity, metal ion binding, alpha-                                                                                                                                                              |
| IgGfC-binding protein                                                             | Q9Y6R7                        | B,C                              | 5.1  | 569395               | 7                                               | Maintenance of the mucosal structure, immune system process                                                                                                                                                                 |
| ATP-binding cassette sub-family A member 13                                       | <b>Q86UQ4</b>                 | C                                | 5.9  | 576239               | 6                                               | Unknown function                                                                                                                                                                                                            |
| Polymeric-immunoglobulin receptor                                                 | <b>P01833</b>                 | C                                | 5.5  | 83313                | 5                                               | Protein transporter activity, immune system process                                                                                                                                                                         |
| Ig alpha-2 chain C region                                                         | P01877                        | B,C                              | 5.7  | 36508                | 5                                               | Antigen binding, immune system process                                                                                                                                                                                      |
| Carbonic anhydrase 6                                                              | <b>P23280</b>                 | A,C                              | 6.4  | 33569                | 5                                               | Lyase activity, metal ion binding                                                                                                                                                                                           |
| Mucin-7 (MUC-7)                                                                   | Q8TAX7                        | A,B,C                            | 9.3  | 36820                | 5                                               | Protein binding, protective capacity by promoting the clearance of bacteria in the oral cavity and aiding in mastication, speech, and swallowing, contribute to the lubricating and viscoelastic properties of whole saliva |
| Actin-binding LIM protein 1                                                       | <b>Q14639</b>                 | B,C                              | 8.8  | 87644                | 5                                               | Actin binding                                                                                                                                                                                                               |
| Cystatin A                                                                        | <b>P01040</b>                 | A,B,C                            | 5.3  | 11006                | 4                                               | Protein binding, cysteine protease inhibitor activity                                                                                                                                                                       |
| Ig alpha-1 chain C region                                                         | P01876                        | A,B,C                            | 6    | 37654                | 4                                               | Antigen binding, immune system process, protein binding                                                                                                                                                                     |
| Serotransferrin                                                                   | <b>P02787</b>                 | A,B                              | 6.8  | 77049                | 4                                               | Metal ion binding                                                                                                                                                                                                           |
| Calgranulin-B (S100A9)                                                            | <b>P06702</b>                 | A,B,C                            | 5.7  | 13241                | 4                                               | Calcium ion binding                                                                                                                                                                                                         |
| Basic salivary-proline-rich protein 4 allele L (Salivary-proline-rich protein Po) | <b>P10162</b>                 | A,B,C                            | 11.5 | 27815                | 4                                               | Precipitation of tannin, lubrication of oral tissue                                                                                                                                                                         |
| Prolactin-inducible protein                                                       | <b>P12273</b>                 | B,C                              | 5.4  | 13522                | 4                                               | Protein binding, cytoskeletal protein binding, actin binding                                                                                                                                                                |
| Transcobalamin-1                                                                  | <b>P20061</b>                 | C                                | 4.8  | 45596                | 4                                               | Metal ion binding, ion transporter activity                                                                                                                                                                                 |
| Zinc-alpha-2-glycoprotein                                                         | <b>P25311</b>                 | B,C                              | 5.5  | 32144                | 4                                               | Lipid binding, protein transporter activity, hydrolase activity,                                                                                                                                                            |
| protein binding                                                                   |                               |                                  |      |                      |                                                 |                                                                                                                                                                                                                             |
| Calmodulin-like protein 3                                                         | <b>P27482</b>                 | A,C                              | 4.3  | 16890                | 4                                               | Metal ion binding                                                                                                                                                                                                           |
| Cystatin D                                                                        | <b>P28325</b>                 | B,C                              | 6.7  | 13858                | 4                                               | Cysteine protease inhibitor activity                                                                                                                                                                                        |
| Lysozyme C                                                                        | P61626                        | B,C                              | 9.2  | 14700                | 4                                               | Hydrolase activity, acting on glycosyl bonds, lysozyme activity                                                                                                                                                             |
| Chromosome 6 open reading frame 58 (Uncharacterized protein C6orf58)              | <b>Q6P552</b>                 | B,C                              | 5.7  | 37925                | 4                                               | Unknown function                                                                                                                                                                                                            |
| Submaxillary gland androgen-regulated protein 3 homolog A precursor               | <b>Q99954</b>                 | A,C                              | 10   | 14117                | 4                                               | Unknown function                                                                                                                                                                                                            |
| Alpha-1-antitrypsin                                                               | <b>P01009</b>                 | A                                | 5.3  | 46736                | 3                                               | Protein binding, protease inhibitor activity                                                                                                                                                                                |
| Cystatin SN precursor                                                             | <b>P01037</b>                 | B,C                              | 6.8  | 16361                | 3                                               | Cysteine protease inhibitor activity                                                                                                                                                                                        |
| Immunoglobulin J chain                                                            | P01591                        | A,B                              | 4.6  | 15594                | 3                                               | Immune system process                                                                                                                                                                                                       |

*continued*

|                                                                                      |               |       |      |        |   |                                                                            |
|--------------------------------------------------------------------------------------|---------------|-------|------|--------|---|----------------------------------------------------------------------------|
| Ig kappa chain C region                                                              | P01834        | A,B   | 5.5  | 11608  | 3 | Antigen binding, immune system process                                     |
| Lactotransferrin                                                                     | P02788        | A,C   | 8.5  | 78181  | 3 | Hydrolase activity, ion binding, peptidase activity, immune system process |
| Calgranulin-A (S100A8)                                                               | <b>P05109</b> | A,B,C | 6.5  | 10834  | 3 | Calcium ion binding                                                        |
| Fatty acid synthase                                                                  | <b>P49327</b> | B,C   | 5.9  | 273399 | 3 | Protein binding, lyase activity, oxidoreductase activity, kinase binding   |
| Basic salivary-proline-rich protein 3 precursor (parotid salivary glycoprotein G1)   | <b>Q04118</b> | B,C   | 10.6 | 29326  | 3 | Bacterial binding, receptor activity, G-protein-coupled receptor activity  |
| Amyloid beta A4 precursor protein binding family B member 1-interacting protein      | <b>Q7Z5R6</b> | A,C   | 5.3  | 73182  | 3 | Signal transduction from Ras activation to actin cytoskeletal remodeling   |
| Uncharacterized aarF domain-containing protein kinase 1                              | <b>Q86TW2</b> | A,C   | 8.84 | 60577  | 3 | Protein kinase activity                                                    |
| Bactericidal/permeability-increasing protein                                         | <b>Q8N4F0</b> | A,B,C | 8.4  | 47125  | 3 | Lipid binding                                                              |
| Short palate, lung, and nasal epithelium carcinoma-associated protein 2              | <b>Q96DR5</b> | C     | 5.3  | 27011  | 3 | Lipid binding                                                              |
| PR domain zinc finger protein 7                                                      | <b>Q9NQW5</b> | A,B   | 8.9  | 45965  | 3 | Transcriptional regulation                                                 |
| Kallikrein-11                                                                        | <b>Q9UBX7</b> | B,C   | 12   | 5445   | 3 | Multifunctional protease                                                   |
| Intron-binding protein aquarius                                                      | <b>O60306</b> | A,C   | 5.9  | 171295 | 2 | Nucleic acid binding                                                       |
| Ig lambda chain C regions                                                            | P01842        | A,B,C | 6.9  | 11236  | 2 | Antigen binding, immune system process                                     |
| Lamin-A/C                                                                            | <b>P02545</b> | B     | 6.5  | 74139  | 2 | Protein binding                                                            |
| Basic salivary-proline-rich protein 1                                                | <b>P04280</b> | B,C   | 10.2 | 5809   | 2 | Precipitation of tannin, lubrication of oral tissue                        |
| Fructose-bisphosphate aldolase A                                                     | <b>P04075</b> | C     | 8.3  | 39288  | 2 | Lyase activity, fructose-bisphosphate aldolase activity                    |
| Histatin-3                                                                           | <b>P15516</b> | B,C   | 9.9  | 4062   | 2 | Protein binding, metal ion binding, bacterial activity                     |
| Ig kappa chain V-III region HAH                                                      | P18135        | A,B   | 9    | 11818  | 2 | Antigen binding, immune system process                                     |
| Actin, cytoplasmic 1                                                                 | <b>P60709</b> | B     | 5.2  | 41736  | 2 | Protein binding, nucleotide binding, ATP binding                           |
| Beta-2-microglobulin                                                                 | <b>P61769</b> | A,C   | 6    | 13714  | 2 | Protein binding                                                            |
| Hemoglobin alpha subunit (hemoglobin alpha chain)                                    | <b>P69905</b> | C     | 8.7  | 15126  | 2 | Oxygen transportation                                                      |
| Neutrophil gelatinase-associated lipocalin                                           | <b>P80188</b> | C     | 9    | 20547  | 2 | Small lipophilic substances                                                |
| Preproteolysin                                                                       | <b>P81605</b> | A,B   | 6    | 11283  | 2 | Metal ion binding                                                          |
| Plasminogen activator inhibitor 1 RNA-binding protein                                | <b>Q8NC51</b> | B,C   | 8.6  | 44965  | 2 | Protein binding, nucleic acid binding                                      |
| Follicular dendritic cell secreted peptide precursor (FDC-SP) (FDC secreted protein) | <b>Q8NFM4</b> | B,C   | 9.3  | 9700   | 2 | Bind to the surfaces of B-lymphoma cells                                   |
| Cystatin S                                                                           | <b>P01036</b> | A,C   | 4.8  | 14188  | 2 | Cysteine protease inhibitor activity                                       |

<sup>a</sup> Protein accession numbers in bold are proteins identified for the first time in labial minor salivary gland secretion, and protein accession numbers underlined are proteins identified for the first time in a salivary sample.

<sup>b</sup> Sample preparations were: (A) in-gel trypsinization, (B) in-solution trypsinization, and (C) in-solution trypsinization, followed by cation exchange chromatography.

<sup>c</sup> The molecular weight listed represents a mass value for the polypeptide chain, excluding post-translational modifications.

<sup>d</sup> The protein list is arranged in descending order according to the number of tryptic peptides observed.
